# Supplementary material
Source: ML conference proceedings conference paper supplement (https://openreview.net/forum?id=4UQD8Prk2BB)
Supplement: supplementary_material [file attachment]

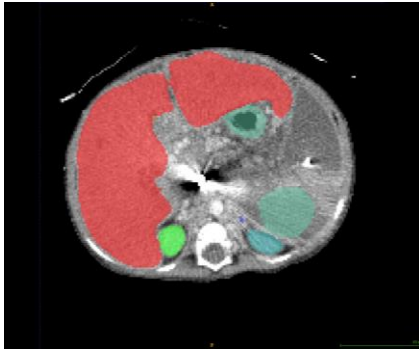

Case 1664

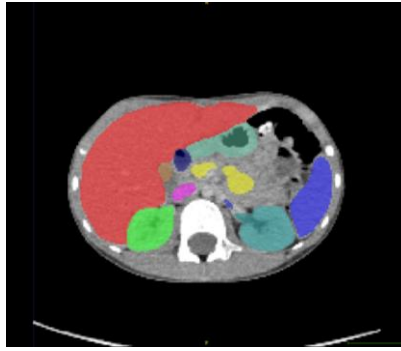

Case 1719

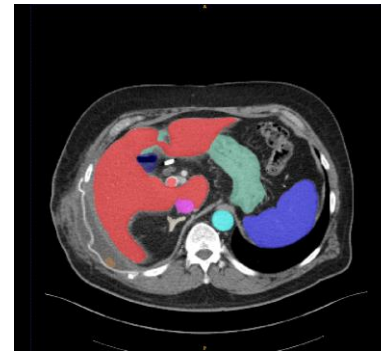

Case 1925

Legend

- |                                                           |                                           |                                                   |                                                 |                                                |                                                            |
|-----------------------------------------------------------|-------------------------------------------|---------------------------------------------------|-------------------------------------------------|------------------------------------------------|------------------------------------------------------------|
| <span style="color: magenta;">■</span> Inferior Vena Cava | <span style="color: red;">■</span> Liver  | <span style="color: blue;">■</span> Duodenum      | <span style="color: brown;">■</span> Esophagus  | <span style="color: yellow;">■</span> Pancreas | <span style="color: green;">■</span> Right Kidney          |
| <span style="color: orange;">■</span> Gallbladder         | <span style="color: cyan;">■</span> Aorta | <span style="color: lightgreen;">■</span> Stomach | <span style="color: teal;">■</span> Left Kidney | <span style="color: blue;">■</span> Spleen     | <span style="color: darkblue;">■</span> Left Adrenal Gland |
